# Supplementary material
Source: MDPI journal article supplement (https://www.mdpi.com/2304-6740/10/2/25)
Supplement: s1 [file s1]

# Supplementary Material

## Reactivity of a sterical flexible pentabenzylcyclopentadienyl samarocene

Niklas Reinfandt and Peter W. Roesky\*

Institute of Inorganic Chemistry  
Karlsruhe Institute of Technology (KIT)  
Engesserstr. 15, Geb. 30.45, D-76131 Karlsruhe, Germany.  
E-mail: roesky@kit.edu

## IR Spectra:

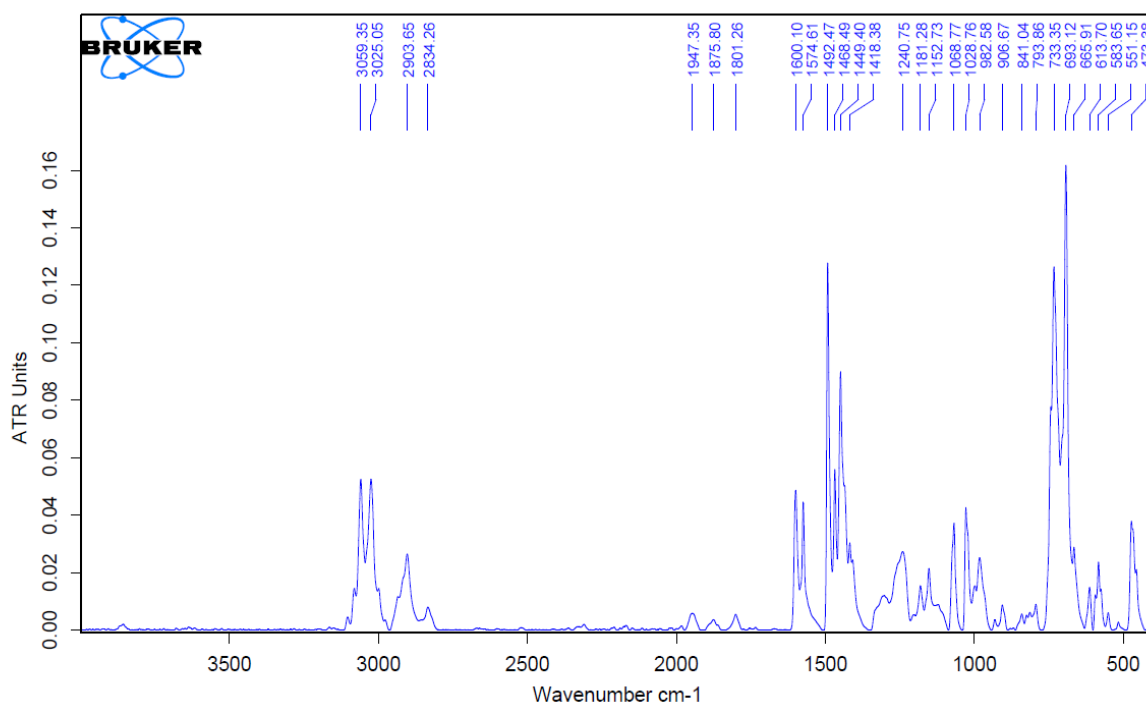

**Figure S1:** IR-Spectrum (ATR) of **1**.

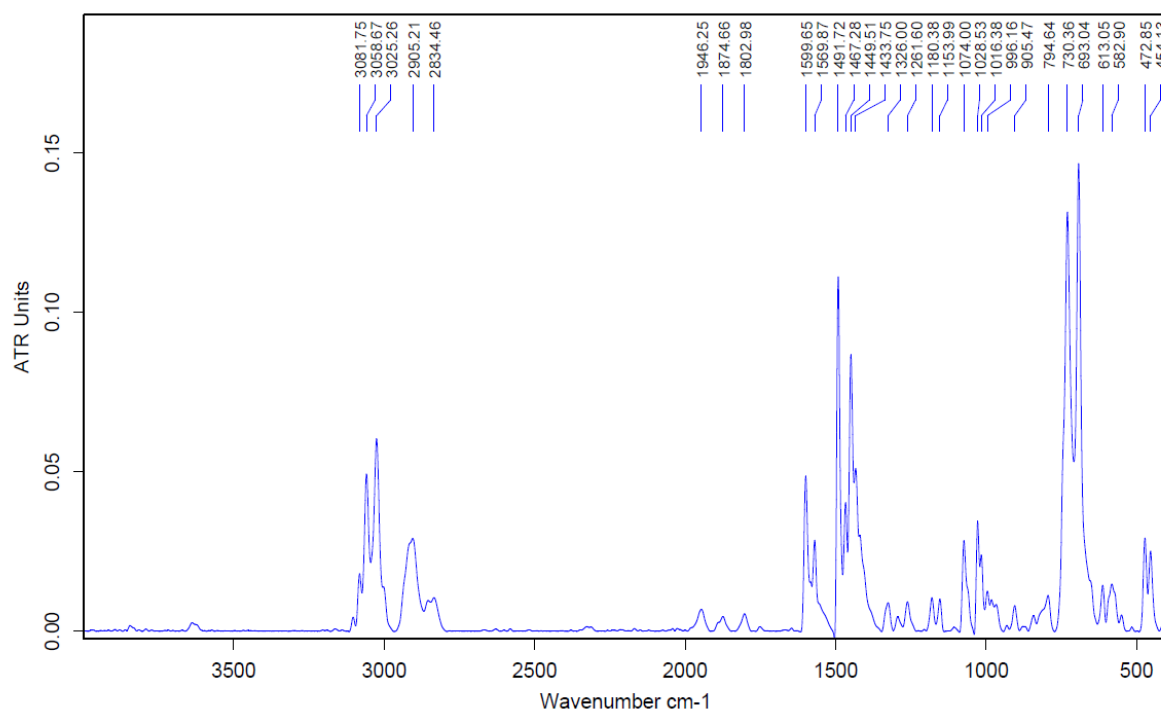

**Figure S2:** IR-Spectrum (ATR) of **2**.

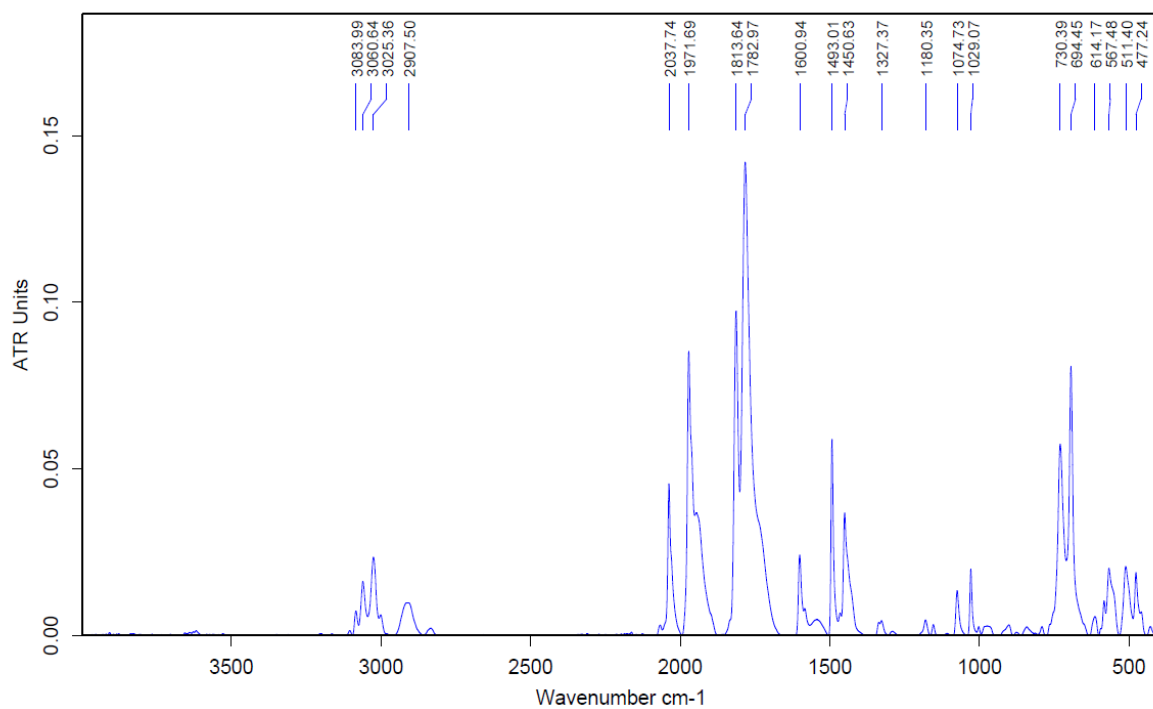

**Figure S3:** IR-Spectrum (ATR) of **3**.

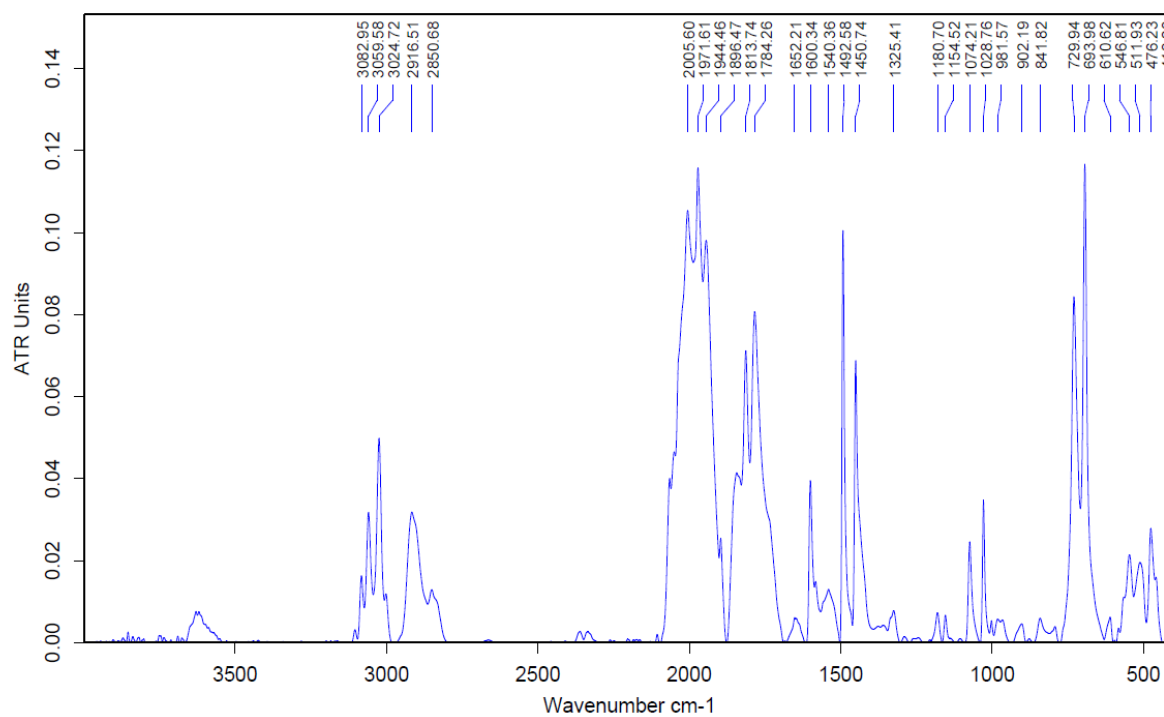

**Figure S4:** IR-Spectrum (ATR) of **4**.

**Table S1:** Crystal data and structure refinement of **1**, **2**, **3**, and **4**.

| Compound                                       | <b>1</b> *0.25 pentane                  | <b>2</b>                             | <b>3</b> *4 toluene                                                              | <b>4</b> *7 toluene                                                               |
|------------------------------------------------|-----------------------------------------|--------------------------------------|----------------------------------------------------------------------------------|-----------------------------------------------------------------------------------|
| <b>Formula</b>                                 | C <sub>87.25</sub> H <sub>78</sub> SeSm | C <sub>86</sub> H <sub>75</sub> SmTe | C <sub>196</sub> H <sub>172</sub> Co <sub>2</sub> O <sub>8</sub> Sm <sub>2</sub> | C <sub>219</sub> H <sub>196</sub> Mn <sub>2</sub> O <sub>10</sub> Sm <sub>2</sub> |
| <i>D</i> <sub>calc.</sub> / g cm <sup>-3</sup> | 1.246                                   | 1.396                                | 1.342                                                                            | 1.239                                                                             |
| <i>μ</i> /mm <sup>-1</sup>                     | 1.359                                   | 1.371                                | 1.037                                                                            | 0.830                                                                             |
| <b>Formula Weight</b>                          | 1355.80                                 | 1386.41                              | 3073.89                                                                          | 3398.33                                                                           |
| <b>Colour</b>                                  | clear orange                            | clear orange                         | clear red                                                                        | clear orange                                                                      |
| <b>Shape</b>                                   | plate                                   | needle                               | prism                                                                            | needle                                                                            |
| <b>Size/mm<sup>3</sup></b>                     | 0.36×0.23×0.07                          | 0.50×0.24×0.07                       | 0.41×0.30×0.18                                                                   | 0.49×0.23×0.08                                                                    |
| <i>T</i> /K                                    | 150                                     | 100                                  | 100                                                                              | 150                                                                               |
| <b>Crystal System</b>                          | orthorhombic                            | monoclinic                           | triclinic                                                                        | triclinic                                                                         |
| <b>Flack Parameter</b>                         | -0.020(7)                               |                                      |                                                                                  |                                                                                   |
| <b>Hoof Parameter</b>                          | 0.018(3)                                |                                      |                                                                                  |                                                                                   |
| <b>Space Group</b>                             | <i>Pca</i> 2 <sub>1</sub>               | <i>P</i> 2 <sub>1</sub> / <i>c</i>   | <i>P</i> -1                                                                      | <i>P</i> -1                                                                       |
| <i>a</i> /Å                                    | 20.4512(4)                              | 20.8310(3)                           | 12.5022(7)                                                                       | 12.5132(6)                                                                        |
| <i>b</i> /Å                                    | 17.0986(3)                              | 30.9713(6)                           | 18.3328(11)                                                                      | 17.0144(9)                                                                        |
| <i>c</i> /Å                                    | 20.6678(4)                              | 20.4461(3)                           | 18.722(2)                                                                        | 21.8686(11)                                                                       |
| <i>α</i> /°                                    |                                         |                                      | 112.860(5)                                                                       | 81.560(4)                                                                         |
| <i>β</i> /°                                    |                                         | 91.1730(10)                          | 101.403(5)                                                                       | 86.486(4)                                                                         |
| <i>γ</i> /°                                    |                                         |                                      | 95.613(5)                                                                        | 81.851(4)                                                                         |
| <i>V</i> /Å <sup>3</sup>                       | 7227.3(2)                               | 13188.3(4)                           | 3803.0(5)                                                                        | 4555.1(4)                                                                         |
| <i>Z</i>                                       | 4                                       | 8                                    | 1                                                                                | 1                                                                                 |
| <i>Z</i> '                                     | 1                                       | 2                                    | 0.5                                                                              | 0.5                                                                               |
| <b>Wavelength h/Å</b>                          | 0.71073                                 | 0.71073                              | 0.71073                                                                          | 0.71073                                                                           |
| <b>Radiation type</b>                          | MoK <sub>α</sub>                        | MoK <sub>α</sub>                     | MoK <sub>α</sub>                                                                 | MoK <sub>α</sub>                                                                  |
| <i>θ</i> <sub>min</sub> /°                     | 1.552                                   | 2.274                                | 2.208                                                                            | 1.643                                                                             |
| <i>θ</i> <sub>max</sub> /°                     | 29.249                                  | 36.893                               | 30.942                                                                           | 29.676                                                                            |
| <b>Measured Refl's.</b>                        | 46978                                   | 125386                               | 35413                                                                            | 47375                                                                             |
| <b>Indep't Refl's</b>                          | 19486                                   | 61980                                | 18824                                                                            | 25229                                                                             |
| <b>Refl's I≥2 σ(I)</b>                         | 12039                                   | 40313                                | 16816                                                                            | 13415                                                                             |
| <i>R</i> <sub>int</sub>                        | 0.0562                                  | 0.0477                               | 0.0299                                                                           | 0.1067                                                                            |
| <b>Parameters</b>                              | 840                                     | 1585                                 | 988                                                                              | 1085                                                                              |
| <b>Restraints</b>                              | 32                                      | 0                                    | 122                                                                              | 123                                                                               |
| <b>Largest Peak</b>                            | 0.619                                   | 1.167                                | 1.780                                                                            | 1.541                                                                             |
| <b>Deepest Hole</b>                            | -0.669                                  | -2.163                               | -1.128                                                                           | -2.975                                                                            |
| <b>Goof</b>                                    | 1.044                                   | 1.053                                | 1.046                                                                            | 1.024                                                                             |
| <b>wR<sub>2</sub> (all data)</b>               | 0.1368                                  | 0.1265                               | 0.1087                                                                           | 0.2913                                                                            |
| <b>wR<sub>2</sub></b>                          | 0.1147                                  | 0.1079                               | 0.1019                                                                           | 0.2308                                                                            |
| <b>R<sub>1</sub> (all data)</b>                | 0.1086                                  | 0.0955                               | 0.0452                                                                           | 0.1745                                                                            |
| <b>R<sub>1</sub></b>                           | 0.0515                                  | 0.0495                               | 0.0389                                                                           | 0.0928                                                                            |
